# Supplementary material for: The erratic mitochondrial clock: variations of mutation rate, not population size, affect mtDNA diversity across birds and mammals
Source: PubMed Central journal article supplement (PMC2660308; doi:10.1186/1471-2148-9-54), 2009-03-10

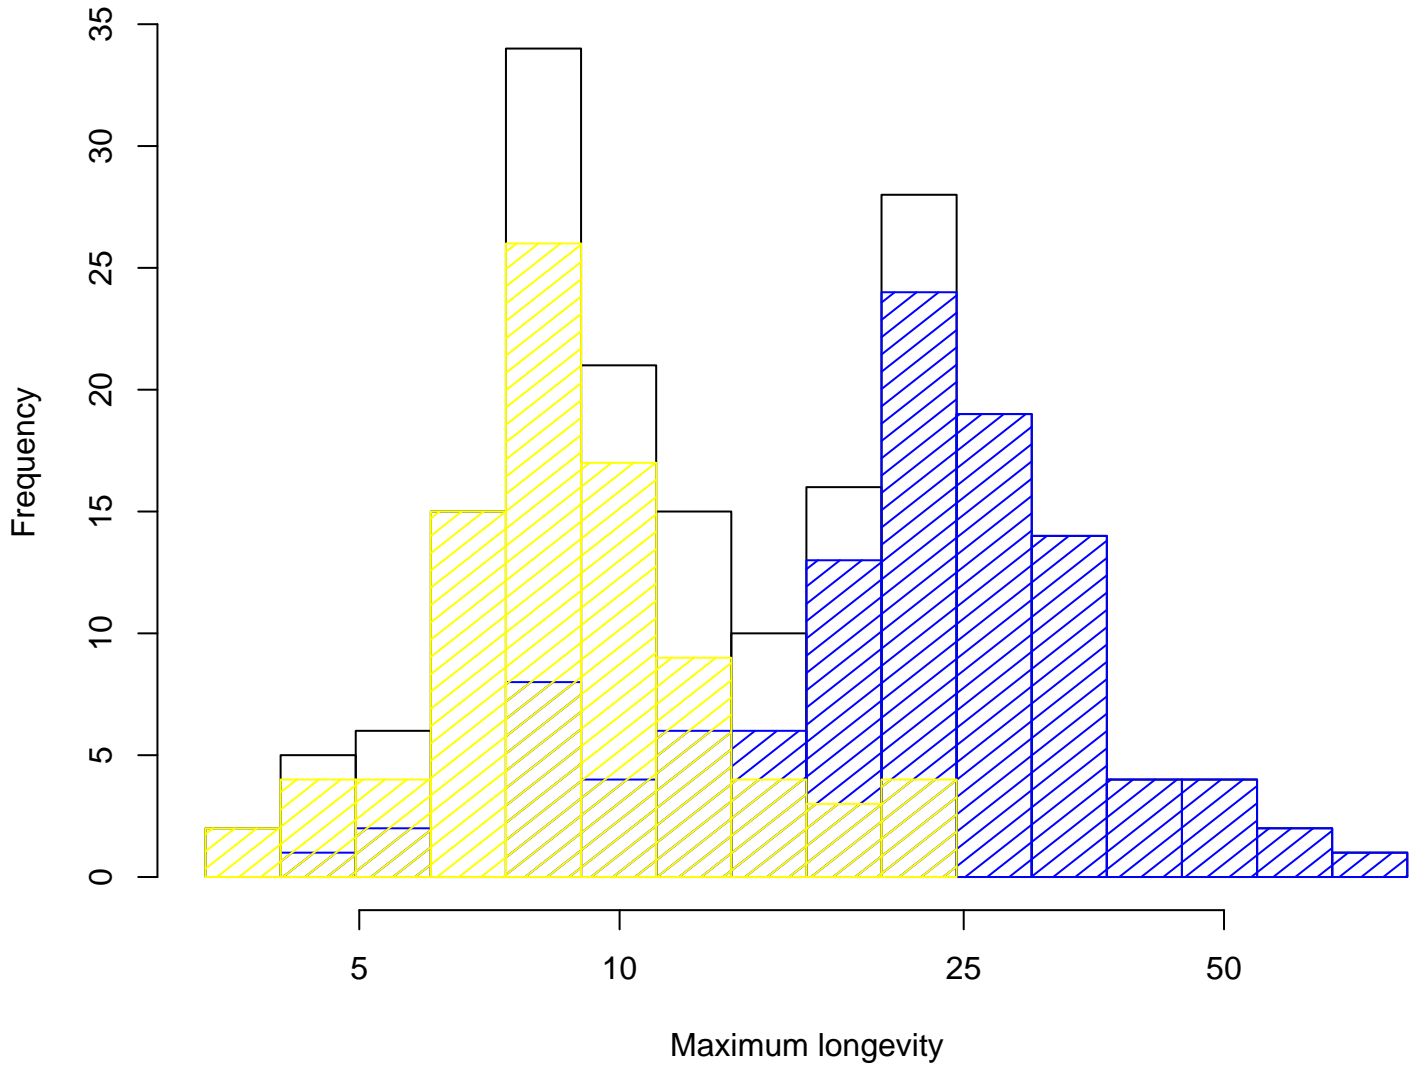

Supplement: 1471-2148-9-54-S1.pdf [file 1471-2148-9-54-S1.pdf]
