# Supplementary material for: The erratic mitochondrial clock: variations of mutation rate, not population size, affect mtDNA diversity across birds and mammals
Source: PubMed Central journal article supplement (PMC2660308; doi:10.1186/1471-2148-9-54), 2009-03-10
Supplement: 1471-2148-9-54-S3.pdf [file 1471-2148-9-54-S3.pdf]

**Table S4 - Effects of life-history variables on mtDNA substitution rate in passerines versus other bird species according the different combination of topologies and programs.**

|                                         |                                     | Passerines (n=88) |                |                 |             | Non-passerines (n=108) |                |                 |            |
|-----------------------------------------|-------------------------------------|-------------------|----------------|-----------------|-------------|------------------------|----------------|-----------------|------------|
|                                         |                                     | slope             | R <sup>2</sup> | <i>p</i> 1      | <i>p</i> 2  | slope                  | R <sup>2</sup> | <i>p</i> 1      | <i>p</i> 2 |
| MULTIDIVTIM<br>E & Ericson<br>topology  | Body mass                           | 0.22              | 0.12           | <b>&lt;0.01</b> |             | -0.15                  | 0.09           | <b>&lt;0.01</b> |            |
|                                         | Maximum<br>longevity                | 0.48              | 0.15           | <b>&lt;0.01</b> |             | -0.37                  | 0.07           | <b>0.01</b>     |            |
|                                         | Body mass +<br>Maximum<br>longevity |                   | 0.17           | 0.13            | <b>0.02</b> |                        | 0.11           | <b>0.04</b>     | 0.13       |
| MCMCTREE &<br>Mitochondrial<br>topology | Body mass                           | -0.24             |                | <b>&lt;0.01</b> |             |                        |                | <b>&lt;0.01</b> |            |
|                                         |                                     |                   | 0.11           |                 |             | -0.10                  | 0.14           |                 |            |
|                                         | Maximum<br>longevity                | -0.29             | 0.04           | <b>0.05</b>     |             | -0.25                  | 0.11           | <b>&lt;0.01</b> |            |
|                                         | Body mass +<br>Maximum<br>longevity |                   | 0.11           | <b>0.01</b>     | 0.79        |                        | 0.17           |                 | 0.06       |
| MCMCTREE &<br>Ericson topology          | Body mass                           |                   |                | <b>&lt;0.01</b> |             |                        |                | <b>&lt;0.01</b> |            |
|                                         |                                     | -0.25             | 0.11           |                 |             | -0.08                  | 0.07           |                 |            |
|                                         | Maximum<br>longevity                | -0.30             | 0.05           | <b>0.05</b>     |             | -0.20                  |                | <b>0.01</b>     |            |
|                                         | Body mass +<br>Maximum<br>longevity |                   | 0.11           | <b>0.01</b>     | 0.77        |                        | 0.09           | 0.07            | 0.18       |
