# Supplementary material for: The erratic mitochondrial clock: variations of mutation rate, not population size, affect mtDNA diversity across birds and mammals
Source: PubMed Central journal article supplement (PMC2660308; doi:10.1186/1471-2148-9-54), 2009-03-10
Supplement: 1471-2148-9-54-S6.pdf [file 1471-2148-9-54-S6.pdf]

| Divergence                     | Maximal Date | Minimal Date | Used in analysis** | Reference                                                              |
|--------------------------------|--------------|--------------|--------------------|------------------------------------------------------------------------|
| Stem Piciformes                | Free         | 32           | Slack / Ericson    | Ericson <i>et al.</i> 2007                                             |
| Stem Trogoniformes             | Free         | 53           | Slack / Ericson    | Ericson <i>et al.</i> 2007                                             |
| Coliiformes                    | Free         | 55           | Slack / Ericson    | Ericson <i>et al.</i> 2007                                             |
| Strigiformes                   | Free         | 60           | Slack / Ericson    | Ericson <i>et al.</i> 2007                                             |
| Spheniscidae / Ciconidae       | 72           | 62           | Slack              | Slack <i>et al.</i> 2006                                               |
| Apodiformes                    | Free         | 53           | Slack / Ericson    | Ericson <i>et al.</i> 2007                                             |
| Trochilidae                    | Free         | 47.5         | Slack / Ericson    | Ericson <i>et al.</i> 2007                                             |
| Anseranas / Anas               | 72           | 66           | Slack / Ericson    | Slack <i>et al.</i> 2006<br>Clarke <i>et al.</i> 2005                  |
| Galliformes                    | Free         | 53           | Slack / Ericson    | Ericson <i>et al.</i> 2007                                             |
| Gaviiformes                    | Free         | 32           | Slack / Ericson    | Ericson <i>et al.</i> 2007                                             |
| Oscine / Suboscine (Passerine) | 77*          | 55           | Slack / Ericson    | Ericson <i>et al.</i> 2002,<br>Barker <i>et al.</i> 2004<br>Boles 1995 |
| Stem Spheniscidae              | Free         | 60           | Ericson            | Ericson <i>et al.</i> 2007                                             |

\*This calibration is secondary points based on Gondwana time frame for passerine evolution.

\*\* We used two alternative phylogenetic trees to date divergences. The first one is conform to Ericson *et al.* 2006 topology and the second one is conform to topology proposed by Slack *et al.* 2006.

Barker FK, Cibois A, Schikler P, Feinstein J, Cracraft J: **Phylogeny and diversification of the largest avian radiation.** *Proceedings of the National Academy of Sciences of the United States of America* 2004, 101: 11040-11045

Boles W: **The World's oldest songbirds.** *Nature* 1995, 374: 21-22

Clarke JA, Tambussi CP, Noriega JI, Erickson GM, Ketchum RA: **Definitive fossil evidence for the extant avian radiation in the Cretaceous.** *Nature* 2005, 433: 305-3088

Ericson PGP, Anderson CL, Britton T, Elzanowski A, Johansson US, Kallersjo M, Ohlson JI, Parsons TJ, Zuccon D, Mayr G: **Diversification of neoaves: integration of molecular sequence data and fossils.** *Biology Letters* 2006, 2: 543-5U1

Ericson PGP, Christidis L, Cooper A, Irestedt M, Jackson J, Johansson US, Norman JA: **A Gondwanan origin of passerine birds supported by DNA sequences of the endemic New Zealand wrens.** *Proc Biol Sci* 2002, 269: 235-241

Slack KE, Jones CM, Ando T, Harrison GLA, Fordyce RE, Arnason U, Penny D: **Early penguin fossils, plus mitochondrial genomes, calibrate avian evolution.** *Molecular Biology and Evolution* 2006, 23: 1144-1155
