# Supplementary material for: The erratic mitochondrial clock: variations of mutation rate, not population size, affect mtDNA diversity across birds and mammals
Source: PubMed Central journal article supplement (PMC2660308; doi:10.1186/1471-2148-9-54), 2009-03-10
Supplement: 1471-2148-9-54-S7.pdf [file 1471-2148-9-54-S7.pdf]

**Table S3 - Effects of life-history variables on mtDNA substitution rate in bird species according the different combination of topologies and programs.**

|                                         | Models                           | Without Phylogenetic control |                |                 |             |
|-----------------------------------------|----------------------------------|------------------------------|----------------|-----------------|-------------|
|                                         |                                  | slope                        | R <sup>2</sup> | <i>p</i> 1      | <i>p</i> 2  |
| MULTIDIVTIME<br>& Ericson topology      | Body mass                        | -0.25                        | 0.37           | <b>&lt;0.01</b> |             |
|                                         | Maximum longevity                | -0.66                        | 0.24           | <b>&lt;0.01</b> |             |
|                                         | Body mass + Maximum<br>longevity |                              | 0.37           | <b>&lt;0.01</b> | 0.46        |
| MCMCTREE &<br>Mitochondrial<br>topology | Body mass                        | -0.28                        | 0.57           | <b>&lt;0.01</b> |             |
|                                         | Maximum longevity                | -0.78                        | 0.42           | <b>&lt;0.01</b> |             |
|                                         | Body mass + Maximum<br>longevity |                              | 0.59           | <b>&lt;0.01</b> | <b>0.01</b> |
| MCMCTREE &<br>Ericson topology          | Body mass                        | -0.28                        | 0.54           | <b>&lt;0.01</b> |             |
|                                         | Maximum longevity                | -0.79                        | 0.39           | <b>&lt;0.01</b> |             |
|                                         | Body mass + Maximum<br>longevity |                              | 0.55           | <b>&lt;0.01</b> | <b>0.03</b> |
